# Supplementary material for: 1,3,4-Azadiphospholides as building blocks for scorpionate and bidentate ligands in multinuclear complexes
Source: Royal Society of Chemistry journal article supplement (doi:10.1039/d0dt01864c), 2020-01-01
Supplement: d0dt01864c1.pdf [file d0dt01864c1.pdf]

## SUPPORTING INFORMATION

|                                                            |           |
|------------------------------------------------------------|-----------|
| <b>Experimental:</b> .....                                 | <b>2</b>  |
| <b>X-Ray Tables</b> .....                                  | <b>7</b>  |
| <b>Calculation Details HOMO LUMO Representations</b> ..... | <b>10</b> |
| <b>Notes and references</b> .....                          | <b>15</b> |

## EXPERIMENTAL:

### General Considerations.

All air- and moisture-sensitive manipulations were carried out using standard vacuum line Schlenk techniques or in an MBraun inert atmosphere dry-box containing an atmosphere of purified argon. THF-*d*<sub>8</sub>, CD<sub>2</sub>Cl<sub>2</sub> and C<sub>6</sub>D<sub>6</sub> were purchased from Cambridge Isotope Laboratories. CD<sub>2</sub>Cl<sub>2</sub> was dried over CaH<sub>2</sub> and distilled, THF-*d*<sub>8</sub> and C<sub>6</sub>D<sub>6</sub> were distilled over potassium. All glassware was stored in a 120°C oven for several hours and was degassed prior to use. Solvents were degassed prior to the filtration over alumina in the PureSolv-purification system by “inert”, the water content was determined by Karl Fischer titration. Solvents were additionally tested using a ketyl test to guarantee oxygen and moisture free conditions. Phosphorus halides were used as purchased. The Na(OCp) and the azadiphospholide Na[1]<sup>1</sup>, [Mo(Mes)(CO)<sub>3</sub>]<sup>2</sup> have been synthesized using literature procedures.

<sup>1</sup>H NMR spectra were recorded on Bruker spectrometers operating at 300, 400 and 500 MHz, <sup>13</sup>C NMR at 75.46 MHz 100.61 MHz. <sup>31</sup>P NMR at 101.28, 121.494 and 161.97 MHz. All <sup>1</sup>H and <sup>13</sup>C NMR chemical shifts are reported relative to SiMe<sub>4</sub> using the <sup>1</sup>H (residual) and <sup>13</sup>C chemical shifts of the solvent as a secondary standard. Peak widths at half heights (in Hz) are given for broad signals. Infrared spectra were collected on a Bruker-alpha FT-IR-spectrometer. UV/Vis spectra were recorded on UV/VIS/NIR lambda-19-spectrometer in a cell with a 1 or 2 mm path length. Elemental analyses were performed at the Mikrolabor of ETH Zürich.

Single crystals suitable for X-ray diffraction were coated with polyisobutylene oil in a glovebox, transferred to a nylon loop and then transferred to the goniometer of a Bruker X8 APEX2 or D8-Venture diffractometer or on an Oxford Excalibur equipped with a molybdenum X-ray tube ( $\lambda = 0.71073 \text{ \AA}$ ). Preliminary data was collected to determine the crystal system. The space group was identified and the data were processed using the Bruker SAINT+ program and corrected for absorption using SADABS. The structures were solved using direct methods (SHELXS) on OLEX2 completed by Fourier synthesis and refined by full-matrix least-squares procedures.

**Preparation of compound 2:** Na[1] (1.7 g, 4.6 mmol) was dissolved in 20 mL of THF and was added dropwise to a solution of PhSiCl<sub>3</sub> (322 mg, 1.5 mmol) in THF cooled to -78°C. The reaction mixture was warmed up to room temperature and was stirred for additional 2 hours. The reaction mixture was filtered through Celite and the volatiles were removed under reduced pressure. The product was washed with a minimal amount of a THF/diethylether (1:1) mixture. To yield 632 mg (70 %) of a yellow solid. MF: C<sub>24</sub>H<sub>17</sub>N<sub>3</sub>O<sub>3</sub>P<sub>6</sub>Si, MW: 609.35 g/mol, MP: 178 °C, EA[calc]: C, 47.31; H, 2.81; N, 6.90, EA[found]: C, 46.71; H, 2.75; N, 6.97, Absorption max [ $\lambda$  nm] : 395.2, 341.4, 326.8. <sup>31</sup>P{<sup>1</sup>H}-NMR (CD<sub>2</sub>Cl<sub>2</sub>, 121.5 MHz):  $\delta$  (ppm) = 123.07 (d, <sup>1</sup>J<sub>P,P</sub> = 442.58 Hz), 118.84 (d, <sup>1</sup>J<sub>P,P</sub> = 442.64 Hz). <sup>1</sup>H-NMR (CD<sub>2</sub>Cl<sub>2</sub>, 121.5 MHz):  $\delta$  (ppm) = 8.58 (d, *J* = 7.08 Hz, 3H, CH), 8.10 (d, *J* = 6.84 Hz, 2H, CH), 7.84-7.96 (m, 3H, CH), 7.65 (t, *J* = 7.52 Hz, 1H CH), 7.52 (t, *J* = 7.40 Hz, 2H, CH), 6.89 (m, 6H, CH). IR[cm<sup>-1</sup>] : 1504.63, 1448.88, 1430.30, 1336.24, 1309.93, 1246.68, 1211.41, 1119.90, 1067.00, 1023.36, 981.55, 882.00, 853.53, 730.31, 689.58

**Preparation of compound Na[3]:** Na[1] (1 g, 2.52 mmol) was dissolved in 20 mL of THF and was added dropwise to a solution of PhBCl<sub>2</sub> (100 mg, 0.63 mmol) in THF cooled to -78°C. The reaction mixture was warmed up to room temperature and was stirred for additional 2 hours. The reaction mixture was filtered through Celite the solution was concentrated to 5 mL of THF layered with hexanes and placed in the freezer to yield 438 mg (69

%) of a yellow crystalline solid. MF:  $C_{44}H_{59}BN_3NaO_9P_6$ , MW: 993.61 g/mol for  $Na[3](THF)_4(DME)_1$ . MP: 168 °C dec.), Absorption max [ $\lambda$  nm]: 417.6, 353.3;  $^{31}P\{^1H\}$ -NMR (121 MHz, THF-d8):  $\delta$  (ppm) = 115.11 (d,  $^1J_{P,P} = 414.6$  Hz), 107.11 (d,  $^1J_{P,P} = 414.6$  Hz).  $^1H$ -NMR (300 MHz, THF):  $\delta$  (ppm) = 8.93 (d,  $J = 7.3$  Hz, 3H), 7.81 (d,  $J = 6.4$  Hz, 2H), 7.54 (dd,  $J = 5.3, 8.5$  Hz, 3H), 6.85 – 7 (m, CH, 3H), 6.62 (t,  $J = 6.6$  Hz, 3H), 6.48 (dd,  $J = 7.0, 7.8$  Hz, 2H).  $^{13}C$ -NMR (75 MHz, THF-d8):  $\delta$  (ppm) = 175.93 (dd,  $^1J_{P,C} = 3.3, 85.9$  Hz), 158.71 (dd,  $^1J_{P,C} = 4.6, 64.4$  Hz), 131.75 (s), 126.57 (d,  $^1J_{P,C} = 21.7$  Hz), 126.1 (s), 123.9 (s), 112.52 (d,  $^1J_{P,C} = 19.3$  Hz), 110.36 (d,  $^1J_{P,C} = 2.5$  Hz).

**Synthesis of 4:**  $POCl_3$  (580 mg, 3.78 mmol) was dissolved in 20 mL THF and was added dropwise at -78 °C to a solution of the sodium salt of the azadiphospholide  $Na[1]$  (4.2 g, 11.35 mmol, 3 eq) in THF (15 mL). The solution was stirred at -78 °C for 1 hour. After that time the reaction mixture was warmed up to room temperature whereupon the colour changed from red to yellow and a precipitate was formed. The solvent was removed under reduced pressure and the remaining solid was dissolved in 40 mL of DCM, filtered through Celite and was dried under reduced pressure to give 1.15 g of a yellow powder (55 % yield). The solid was extracted twice with THF (20 mL) to yield another 609 mg of product. Combined 1.759 g (84 % yield) of product were isolated. The compound is soluble in THF and DCM and only barely soluble in diethyl ether and toluene and insoluble in hexane. MF:  $C_{18}H_{12}N_3O_4P_7$ , MW: 551.13 g/mol, MP: 140 °C (decomposition), EA[calc]: C, 39.23; H, 2.19; N, 7.62, EA[found]: C, 38.99; H, 2.43; N, 7.36, Absorption max [ $\lambda$  nm] : 395.2, 341.4, 326.8.  $^{31}P$ -NMR{ $^1H$ } ( $CD_2Cl_2$ , 121.5 MHz):  $\delta$  (ppm) = 140.24 (d,  $^1J_{P,P} = 446.5$  Hz), 129.41 (d,  $^1J_{P,P} = 446.5$  Hz), -20.78 (s, PO).  $^1H$ -NMR ( $CD_2Cl_2$ , 300 MHz):  $\delta$  (ppm) = 8.18 – 8.32 (m, 1H,  $CH_{arom}$ ), 7.81 – 7.94 (m, 1H,  $CH_{arom}$ ), 6.75 – 6.92 (m, 2H,  $CH_{arom}$ ).  $^{13}C\{^1H\}$ -NMR ( $CD_2Cl_2$ , 300 MHz):  $\delta$  (ppm) = 162.84 (d,  $J_{P,C} = 72.88$  Hz), 158.82 (d,  $J_{P,C} = 86.85$  Hz), 128.42 (d,  $J_{P,C} = 23.27$  Hz), 117.96 (d,  $J_{P,C} = 18.72$  Hz), 115.40 (d,  $J_{P,C} = 2.68$  Hz). IR[ $cm^{-1}$ ] : 2963, 1261 (P=O), 1091, 1021, 799

**Preparation of complex 5:** Compound **2** (100 mg, 0.11 mmol) and  $[MesMo(CO)_3]$  (45 mg, 0.15 mmol) were placed in a scintillation vial in the glovebox and were suspended in 4 mL of THF. The reaction mixture was left unstirred overnight. The colour of the reaction mixture changed from yellow to red and was filtered then over a glass filter and was layered with hexane before it was placed in the freezer at -35 °C for crystallization. After 72 hours a dark yellow crystalline material was formed which was filtered off and washed with hexane to yield 64 mg (74 %) of product. Once crystallized the product was nearly insoluble in the common deuterated organic solvents. MF:  $C_{27}H_{17}MoN_3O_6P_6Si$ , MW: 789.34 g/mol, MP: no < 400 °C, EA[calc]: C, 41.08; H, 2.17; N, 5.32, EA[found]: C, 40.98; H, 2.08; N, 5.27, Absorption max [ $\lambda$  nm] : 426.7, 333.7, 270.9.  $^{31}P\{^1H\}$ -NMR ( $CD_2Cl_2$ ): 141.77 (m), 98.27 (m). IR[ $cm^{-1}$ ] : 1959.58, 1896.16, 1870.90, 1609.73, 1355.60, 1308.51, 1253.60, 1221.42, 1123.46, 875.45, 724.85

**Preparation of compound Na[6]:**  $Na[3]$  (200 mg, 0.2 mmol) and  $[MesMo(CO)_3]$  (80 mg, 0.26 mmol) were placed in a scintillation vial in the glovebox and 4 mL of THF and 18C6 (52 mg, 0.2 mmol) was added. The reaction was stirred overnight to form a yellow microcrystalline solid. The colour of the reaction mixture changed from yellow to red. The reaction mixture was filtered to isolate 230 mg (95 %) of a yellow solid of composition  $Na(18C6)_1(THF)_2[Mo(CO)_3(3)]$ . The mother liquor was placed in the freezer to obtain single crystals suitable for X-ray diffraction. MF:  $C_{47}H_{57}BMoN_3NaO_{14}P_6$ , MW: 1203.6 g/mol, MP: 198 °C (dec.), EA[calc]: C, 46.90; H, 4.77; N, 3.49, EA[found]: C, 45.46; H 4.40; N 3.53; Absorption max [ $\lambda$  nm] : 445.1;  $^1H$  NMR (500 MHz,  $CD_2Cl_2$ ):

=  $\delta$  8.29 (d,  $J$  = 7.2 Hz, 3H, CH<sub>arom</sub>), 7.97 (d,  $J$  = 7.4 Hz, 2H, CH<sub>arom</sub>), 7.69 (t,  $J$  = 7.3, 3H, CH<sub>arom</sub>), 7.41 (m, 2H, CH<sub>arom</sub>), 7.36 (m, 1H, CH<sub>arom</sub>), 6.64 (dd,  $J$  = 7.1, 8.0 Hz, 3H, CH<sub>arom</sub>), 6.56 (dt,  $J$  = 1.3, 6.6 Hz, 3H, CH<sub>arom</sub>). <sup>31</sup>P{<sup>1</sup>H}-NMR (121 MHz, CD<sub>2</sub>Cl<sub>2</sub>):  $\delta$  (ppm) = 125.6 (m), 89.3 (m) with  $^1J_{A,X}$  = 450.1 Hz,  $J_{A,A'}$  = 38.03 Hz,  $J_{A,X'}$  = 2.2 Hz,  $^1J_{X,X'}$  = 9.43 Hz. <sup>13</sup>C-NMR (125.8 MHz, THF-d<sub>8</sub>):  $\delta$  (ppm) = 220.0 (m, broad, CO), 173.7 (broad, CP), 160.73 (d,  $J_{P,C}$  = 67.95 Hz, CP), 131.5 (s), 127.97 (d,  $J_{P,C}$  = 26.23 Hz), 127.7 (s), 126.8 (s), 126.4, 125.4 (s), 116.13 (1C, d,  $J_{P,C}$  = 20.27 Hz), 116.14 (s).

**Preparation of compound 7:** CpTiCl<sub>3</sub> (48 mg, 0.22 mmol) and Na[1] (210 mg, 0.65 mmol) were placed in a scintillation vial in the glovebox and the solids were covered with 1 mL of hexane. 3 mL of toluene were slowly added. The reaction was let unstirred overnight and the product crystallized over 3 days as purple blocks. The solid was collected on a glass frit. To remove the remaining NaCl, the product was dissolved in THF and was filtered through Celite. The volatiles were removed and 40 mg of a dark purple solid was isolated. The purple reaction solution was layered with hexane and put in the freezer for 14 days to crystallize another 16 mg of the product. A total amount of 56 mg (41 % yield) was isolated.

**Alternative route for the synthesis of compound 7:** CpTiCl<sub>3</sub> (48 mg, 0.22 mmol) was dissolved in 10 mL of THF and was cooled to -78°C. The Na[1] (210 mg, 0.65 mmol) was dissolved in 10 mL of THF and was added slowly under vigorous stirring. It is not recommended to use an excess of the sodium salt of the phospholide Na[1]. The sodium salt replaced the cyclopentadienyl group to form the product Na<sub>2</sub>[8<sub>Ti</sub>]. The reaction mixture was stirred for 1 hour at this temperature before it was warmed up to room temperature. The reaction mixture was left unstirred for 2 hours to settle the precipitate. The mixture was then filtered through Celite. The filtrate was concentrated to roughly 4 mL and was layered with 4 mL of hexane. The layered solution was placed in the freezer at -35 °C for one week. Dark purple crystals formed, which were collected on a glass frit and were dried under reduced pressure to obtain 62 mg (46 %) of a purple solid. MF: C<sub>23</sub>H<sub>17</sub>N<sub>3</sub>O<sub>3</sub>P<sub>6</sub>Ti, MW: 617.12 g/mol, MP: 228 °C, EA[calc]: C, 44.77; H, 2.78; N, 6.81, EA[found]: C, 44.12; H, 2.79; N, 6.43, Absorption max [ $\lambda$  nm]: 393, 498. <sup>1</sup>H/<sup>31</sup>P{<sup>1</sup>H} NMR were measured in CD<sub>2</sub>Cl<sub>2</sub> but the product slowly decomposes. Therefore the <sup>13</sup>C NMR spectrum was measured in THF. <sup>31</sup>P{<sup>1</sup>H}-NMR (CD<sub>2</sub>Cl<sub>2</sub>, 121.5 MHz):  $\delta$  (ppm) = 129.7 (d,  $^1J_{P,P}$  = 444.3 Hz), 120.6 (d,  $^1J_{P,P}$  = 444.3 Hz). <sup>1</sup>H-NMR (CD<sub>2</sub>Cl<sub>2</sub>, 300 MHz):  $\delta$  (ppm) = 8.42 (d,  $^3J_{H,H}$  = 6.81 Hz, 3H, CH), 7.86 (dd,  $^3J_{H,H}$  = 7.51 Hz,  $^3J_{H,H}$  = 5.93 Hz, 3H, CH), 6.9 – 6.75 (m, 3H, CH), 6.79 (s, 5H, CH), 5.24 (m, 3H, CH). <sup>13</sup>C{<sup>1</sup>H}-NMR (THF, 121.5 MHz):  $\delta$  (ppm) = 182.60 (d,  $J_{P,C}$  = 69.97 Hz), 159.43 (d,  $J_{P,C}$  = 68.86 Hz), 127.43 (d,  $J_{P,C}$  = 22.28 Hz, CH), 123.6 (s, CH), 120.53 (s, CH, Cp), 115.74 (d,  $J_{P,C}$  = 18.36 Hz, CH), 113.38 (d,  $J_{P,C}$  = 2.60 Hz, CH). IR[cm<sup>-1</sup>]: 1318.85, 1281.72, 1212.15, 1111.04, 1013.50, 780.15, 735.00, 687.54

**Preparation of complex Na<sub>2</sub>[8<sub>Ti</sub>](DME)<sub>6</sub>:** Titanium tetrachloride di tetrahydrofuran, [TiCl<sub>4</sub>(THF)<sub>2</sub>], (400 mg 1.2 mmol) was dissolved in 10 mL of THF and then added to a solution of Na[1] (2.7 g 7.2 mmol) in THF. The reaction mixture turned dark green to black immediately. The solution was stirred for 1 h at room temperature. The volatiles were removed under vacuum and the remaining product was dissolved in 20 mL of DCM. The mixture was filtered to remove NaCl. All volatiles were removed under reduced pressure. To the solid, DME (2 mL) and hexanes (8 mL) were added. The suspension was filtered and the product was collected on the glass frit. 1.932 g (98 %) of a dark green solid was isolated. The product was recrystallized from a saturated DCM solution at -30°C for single crystals suitable for X-ray structure analysis. MF: C<sub>60</sub>H<sub>84</sub>N<sub>6</sub>Na<sub>2</sub>O<sub>18</sub>P<sub>12</sub>Ti, MW: 1642.87 g/mol, MP: 137 °C, Absorption max [ $\lambda$  nm]: 520 nm. <sup>31</sup>P{<sup>1</sup>H}-NMR (CD<sub>2</sub>Cl<sub>2</sub>, 121.5 MHz, 298 K):  $\delta$  = 111.7 (d,  $^1J_{P,P}$  = 434.5 Hz),

110.3 (d,  $^1J_{P,P} = 434.5$  Hz).  $^1\text{H-NMR}$  ( $\text{CD}_2\text{Cl}_2$ , 300 MHz):  $\delta$  (ppm) = 8.58 (m, CH, 6H), 7.57 (m, CH, 6H), 6.46 (m, CH, 6H), 6.23 (m, CH, 6H).  $^{13}\text{C}\{^1\text{H}\}\text{-NMR}$  ( $\text{CD}_2\text{Cl}_2$ , 100.5 MHz):  $\delta$  (ppm) = 186.2 (dd,  $J_{P,C} = 16.99, 57.74$  Hz), 160.1 (dd,  $J_{P,C} = 7.93, 52.65$  Hz), 128.4 (d,  $J_{P,C} = 17.63$  Hz), 126.9 (s), 116.02 (d,  $J = 16.4$  Hz), 112.6 (s). IR[ $\text{cm}^{-1}$ ]: 1341, 1289, 1079, 1063

**Preparation of complex  $\text{Na}_2[\text{8}_{\text{Zr}}](\text{DME})_6$ :** Zirconium tetrachloride THF adduct,  $[\text{ZrCl}_4(\text{THF})_2]$ , (97 mg 0.26 mmol) was suspended in 4 mL of THF. To this suspension, Na[1] (592 mg 1.6 mmol) in 4 mL of THF was added dropwise while stirring. The solution was stirred for 2 h at room temperature and the volatiles were removed under reduced pressure. The yellow solid was dissolved in DCM and filtered over Celite. The volatiles were removed under reduced pressure and the product was washed with a minimal amount of cold DME (2 mL) and hexanes ( $3 \times 4$  mL) to give 396 mg (90 %) of a yellow crystalline material.  $^1\text{H-NMR}$  analysis revealed the co-crystallization of two DME molecules per sodium ion. MF:  $\text{C}_{60}\text{H}_{84}\text{N}_6\text{Na}_2\text{O}_{18}\text{P}_{12}\text{Zr}$ , MW: 1686.22 g/mol ( $\text{DME})_6$ , MP: 141 °C, Absorption max [ $\lambda$  nm]: 422.5, 356.7, 345.8.  $^{31}\text{P}\{^1\text{H}\}\text{-NMR}$  ( $\text{CD}_2\text{Cl}_2$ , 121.5 MHz):  $\delta$  (ppm) = 105.1 (d,  $^1J_{PP} = 426.2$  Hz), 99.4 (d,  $^1J_{PP} = 426.2$  Hz).  $^1\text{H-NMR}$  ( $\text{CD}_2\text{Cl}_2$ , 300 MHz):  $\delta$  (ppm) = 8.64 (m, 6H, CH), 7.57 (m, 6H, CH), 6.46 (m, 6H, CH), 6.24 (m, 6H, CH).  $^{13}\text{C}\{^1\text{H}\}\text{-NMR}$  ( $\text{CD}_2\text{Cl}_2$ , 75 MHz):  $\delta$  (ppm) = 184.1 (dd,  $J_{P,C} = 5.7, 64.7$  Hz), 161.7 (d,  $J_{P,C} = 60.4$  Hz), 129.2 (d,  $J_{P,C} = 20.7$  Hz), 126.4 (s), 116.3 (d,  $J_{P,C} = 18.4$  Hz), 113.6 (d,  $J_{P,C} = 2.0$  Hz), IR[ $\text{cm}^{-1}$ ]: 3095, 2989, 2912, 2823, 1348, 1293, 1070, 1063

**Preparation of complex  $\text{Na}_2[\text{8}_{\text{Hf}}](\text{DME})_6$ :** Hafnium tetrachloride (32 mg 0.1 mmol) and Na[1] (223 mg 0.6 mmol) were suspended in 4 mL of DME. The solution was stirred for 16 h at room temperature. The yellow product precipitated out of the solution and was filtered off. The solid was extracted with DCM and filtered again to remove the NaCl. The volatiles were removed under reduced pressure to yield 138 mg (78 %) of a yellow solid. Single crystals suitable for X-ray analysis were grown from a DCM solution at -35 °C. MF:  $\text{C}_{60}\text{H}_{84}\text{N}_6\text{Na}_2\text{O}_{18}\text{P}_{12}\text{Hf}$ , MW: 1773.49 g/mol ( $\text{DME})_6$ , MP: 143.3 °C, Absorption max [ $\lambda$  nm]: 409.0.  $^{31}\text{P}\{^1\text{H}\}\text{-NMR}$  ( $\text{CD}_2\text{Cl}_2$ , 121.5 MHz):  $\delta$  (ppm) = 104.9 (d,  $^1J_{P,P} = 426.3$  Hz), 98.8 (d,  $^1J_{P,P} = 426.3$  Hz).  $^1\text{H-NMR}$  ( $\text{CD}_2\text{Cl}_2$ , 300 MHz):  $\delta$  (ppm) = 8.50 (m, 6H, CH), 7.50 (m, 6H, CH), 6.39 (m, 6H, CH), 6.15 (m, 6H, CH).  $^{13}\text{C}\{^1\text{H}\}\text{-NMR}$  ( $\text{CD}_2\text{Cl}_2$ , 75 MHz):  $\delta$  (ppm) = 171.3 (dd,  $J_{P,C} = 66.1$  Hz,  $J_{P,C} = 4.3$  Hz), 160.5 (d,  $J_{P,C} = 61.3$  Hz), 127.9 (d,  $J_{P,C} = 21.0$  Hz), 125.0 (s), 115.0 (d,  $J_{P,C} = 18.8$  Hz), 112.2 (s). IR[ $\text{cm}^{-1}$ ]: 3095, 2989, 2910, 2823, 1399, 1351, 1259, 1113, 1080, 1013

**Preparation of complex 9: 7** (31 mg, 0.05 mmol) was dissolved in 6 mL of THF.  $[\text{MoMes}(\text{CO})_3]$  (15 mg, 0.05 mmol) was added to the solution and the reaction mixture was stirred for 15 minutes. The reaction was filtered over a glass filter paper and left unstirred over the weekend, upon dark red crystals grow directly from the reaction mixture. 32 mg (80 %) of product was isolated. The product was nearly insoluble in common deuterated organic solvents. MF:  $\text{C}_{26}\text{H}_{17}\text{MoN}_3\text{O}_6\text{P}_6\text{Ti}$ , MW: 797.11 g/mol, MP: no < 400 °C, EA[calc]: C, 39.18; H, 2.15; Mo, 12.04; N, 5.27, EA[found]: C, 39.36; H, 2.42; N, 4.89, Absorption max [ $\lambda$  nm]: 423.2.  $^1\text{H-NMR}$  ( $\text{THF-d}_8$ , 300 MHz):  $\delta$  (ppm) = 8.47 - 8.39 (m, br, 3H), 7.74-7.64 (m, br, 3H), 7.41 (s, 5H, Cp), 7.05-6.92 (m, br, 3H), 6.79-6.69 (m, br, 3H). IR[ $\text{cm}^{-1}$ ]: 1943.31 (CO), 1862.74 (CO), 1319.60, 1290.62, 1253.59, 732.10

**Attempts for the preparation of complex  $\text{Na}_2[\text{10}_{\text{Ti}}]$ :**  $\text{Na}_2[\text{8}_{\text{Ti}}]$  (190 mg, 0.116 mmol), 18-crown-6 (54 mg, 0.2 mmol) and  $[\text{MoMes}(\text{CO})_3]$  (60 mg, 0.202 mmol) were dissolved in 12 mL of THF. The solution was left unstirred overnight upon a dark green micro crystalline solid precipitated from the reaction mixture. The solid was filtered off and dried under reduced pressure. 220 mg (96 %) were isolated. The product is insoluble in common organic solvents. MF:  $\text{C}_{66}\text{H}_{72}\text{TiMo}_2\text{N}_6\text{Na}_2\text{O}_{24}\text{P}_{12}$ , MW: 1990.71 g/mol, IR[ $\text{cm}^{-1}$ ]: 1925 (CO), 1829 (CO)

**Preparation of complex Na<sub>2</sub>[10<sub>Hf</sub>]:** Na<sub>2</sub>[8<sub>Hf</sub>] (180 mg, 0.101 mmol), 18-crown-6 (54 mg, 0.2 mmol) and [MoMes(CO)<sub>3</sub>] (60 mg, 0.202 mmol) were dissolved in 12 mL of DCM. The solution was left unstirred for 16 hours upon dark red crystals grow directly from the reaction mixture. The solid was filtered off and dried under reduced pressure to isolate 132 mg (61 %). The product is only badly soluble in THF and nearly insoluble in other common deuterated organic solvents. Single crystals for X-ray analysis were picked from the first crop of isolated product. MF: C<sub>66</sub>H<sub>72</sub>HfMo<sub>2</sub>N<sub>6</sub>Na<sub>2</sub>O<sub>24</sub>P<sub>12</sub>, MW: 2121.39 g/mol, MP: 224 °C, Absorption max [ $\lambda$  nm]: 428.6, 443.2 (shoulder). <sup>1</sup>H-NMR (DMF-d<sub>7</sub>, 300 MHz):  $\delta$  (ppm) = 7.90 (m, 1H, CH), 7.62 (m, 1H, CH), 6.44 (m, 1H, CH), 5.96 (m, 1H, CH). <sup>31</sup>P{<sup>1</sup>H}-NMR (DMF-d<sub>7</sub>, 121.5 MHz):  $\delta$  (ppm) = 111.8 (m), 84.5 (m). <sup>13</sup>C{<sup>1</sup>H}-NMR (DMF-d<sub>7</sub>, 75.5 MHz):  $\delta$  (ppm) = 214.54 (m, carbonyl), 176.31 (s-broad), 154.70 (d,  $J_{P,C}$  = 67.35 Hz), 122.68 (d,  $J_{P,C}$  = 25.67 Hz), 118.1 (s), 110.75 (d,  $J_{P,C}$  = 18.71 Hz), 107.9 (s). IR[cm<sup>-1</sup>] : 2870.07, 1929.57 (CO), 1817.34 (CO), 1605.99, 1500.46, 1450.60, 1394.73, 1348.95, 1293.22, 1245.96, 1088.34, 1015.54, 945.82, 775.56, 732.02, 689.30

**Preparation of compound 11:** Na[1] (740 mg, 2 mmol) was suspended in toluene and (iPr<sub>2</sub>N)<sub>2</sub>PCl (532 mg, 2 mmol) dissolved in 5 mL of toluene was added dropwise to the stirred suspension. The colour of the mixture changed from orange to dark yellow. The mixture was stirred for 16 hours at room temperature before it was filtered through Celite. The volatiles were removed to isolate 655 mg of a yellow solid (82 %). Single crystals were obtained from a saturated toluene solution at -35 °C. In solution two isomers were observed, only isomer A was fully characterized by NMR spectroscopy. MF: C<sub>18</sub>H<sub>32</sub>N<sub>3</sub>OP<sub>3</sub>, MW: 399.4 g/mol, MP: 148°C, EA[calc]: C, 54.13; H, 8.08; N, 10.52, EA[found]: C, 54.00; H, 7.96; N, 10.58, Absorption max [ $\lambda$  nm]: 398 , 331 **Isomer A:** <sup>31</sup>P{<sup>1</sup>H}-NMR (C<sub>6</sub>D<sub>6</sub>, 121.5 MHz):  $\delta$  (ppm) = 134.3 (dd,  $^1J_{P,P}$  = 121.8 Hz,  $^2J_{P,P}$  = 18.7 Hz), 121.8 (dd,  $^1J_{P,P}$  = 425.5 Hz,  $^2J_{P,P}$  = 20.0 Hz), 109.0 (dd,  $^1J_{P,P}$  = 425.5 Hz,  $^1J_{P,P}$  = 120.7 Hz). <sup>1</sup>H-NMR (C<sub>6</sub>D<sub>6</sub>, 300 MHz):  $\delta$  (ppm) = 8.38 (d,  $^3J_{H,H}$  = 7.03 Hz, 1H, CH), 7.64 (dd,  $^3J_{H,H}$  = 8.84 Hz,  $^3J_{H,H}$  = 9.11 Hz, 1H, CH), 6.28 (pseudo-t,  $^3J_{H,H}$  = 6.6 Hz, 1H, CH), 6.15 (dd,  $^3J_{H,H}$  = 7.03 Hz,  $^3J_{H,H}$  = 9.11 Hz, 1H, CH), 3.52 (sept,  $^3J_{H,H}$  = 6.55 Hz, 4H, CH), 1.12 (d,  $^3J_{H,H}$  = 6.55 Hz, 24H, CH<sub>3</sub>). <sup>13</sup>C{<sup>1</sup>H}-NMR (C<sub>6</sub>D<sub>6</sub>, 125.8 MHz):  $\delta$  (ppm) = 173.98 (dd,  $J_{P,C}$  = 22.12, 85.97 Hz), 162.67 (dd,  $J_{P,C}$  = 6.53, 71.56 Hz), 130.03 (d,  $J_{P,C}$  = 22.32 Hz), 123.9 (s), 115.85 (d,  $J_{P,C}$  = 20.05 Hz), 114.30 (d,  $J_{P,C}$  = 2.87 Hz), 45.91 (d,  $J_{P,C}$  = 12.59 Hz), 24.50 (d,  $J_{P,C}$  = 9.14 Hz), 24.07 (d,  $J_{P,C}$  = 5.53 Hz). IR[cm<sup>-1</sup>] : 2970.63, 2926.97, 2865.76, 1453.98, 1390.86, 1362.40, 1318.36, 1302.31, 1249.03, 1197.08, 1175.71, 1152.72, 1113.87, 1024.44, 955.86, 871.51, 782.40, 741.15, 692.17 **Isomer B:** <sup>31</sup>P{<sup>1</sup>H}-NMR (DME, 121.5 MHz):  $\delta$  (ppm) = 136.1 (s), 116.45 (d,  $^1J_{P,P}$  = 442.2 Hz), 96.76 (d,  $^1J_{P,P}$  = 442.2 Hz).

**Synthesis of 12:** [Mo(Mes)(CO)<sub>3</sub>] (30 mg, 0.1 mmol) and **11** (40 mg, 0.1 mmol) were placed in a 10 mL Schlenk tube. DCM (2 mL) was added and the solution was left unstirred at room temperature. Overnight orange crystals of composition [ {Mo(CO)<sub>3</sub>(**11**) }<sub>4</sub> ] were formed. The solid was filtered off and dried under reduced pressure to isolate 48 mg (83 %) of an orange crystalline material. The crystals formed were of suitable quality to get single crystal X-ray analysis of the solid. The product was insoluble in common deuterated organic solvents. MF: C<sub>21</sub>H<sub>32</sub>MoN<sub>3</sub>O<sub>4</sub>P<sub>3</sub>, MW: 579.39 g/mol, MP: 198 °C (dec.), EA[calc]: C, 43.53; H, 5.57; N, 7.25; EA[found]: C, 43.76; H, 5.71; N, 6.99. IR[cm<sup>-1</sup>] : 2965.09, 1964.90, 1949.96, 1897.80, 1848.94, 1355.65, 1312.23, 1250.88, 1176.22, 1114.99, 966.47, 859.61

|                   | <b>9</b>                                                                          | Na <sub>2</sub> [ <b>8<sub>Ti</sub></b> ]                                                                         | Na[ <b>8<sub>Hf</sub></b> ]                                                                      | Na <sub>2</sub> [ <b>10<sub>Hf</sub></b> ]                                                                                          |
|-------------------|-----------------------------------------------------------------------------------|-------------------------------------------------------------------------------------------------------------------|--------------------------------------------------------------------------------------------------|-------------------------------------------------------------------------------------------------------------------------------------|
| CCDC              | CCDC 1494722                                                                      | CCDC 1494723                                                                                                      | CCDC 1494718                                                                                     | CCDC 1494720                                                                                                                        |
| Empirical formula | C <sub>30</sub> H <sub>25</sub> MoN <sub>3</sub> O <sub>7</sub> P <sub>6</sub> Ti | C <sub>62</sub> H <sub>88</sub> Cl <sub>4</sub> N <sub>6</sub> Na <sub>2</sub> O <sub>18</sub> P <sub>12</sub> Ti | C <sub>60</sub> H <sub>84</sub> HfN <sub>6</sub> Na <sub>2</sub> O <sub>18</sub> P <sub>12</sub> | C <sub>68</sub> H <sub>88</sub> Cl <sub>3.92</sub> HfMo <sub>2</sub> N <sub>6</sub> Na <sub>2</sub> O <sub>24</sub> P <sub>12</sub> |
| Formula weight    | 869.19                                                                            | 1812.70                                                                                                           | 1773.44                                                                                          | 2300.25                                                                                                                             |
| Temperature/K     | 100                                                                               | 99.55                                                                                                             | 293(2)                                                                                           | 104(2)                                                                                                                              |
| Crystal system    | monoclinic                                                                        | monoclinic                                                                                                        | monoclinic                                                                                       | triclinic                                                                                                                           |
| Space group       | P2 <sub>1</sub> /c                                                                | P2 <sub>1</sub> /n                                                                                                | P2 <sub>1</sub> /n                                                                               | P-1                                                                                                                                 |
| a/Å               | 11.0367(3)                                                                        | 12.9086(7)                                                                                                        | 15.9451(3)                                                                                       | 13.1135(3)                                                                                                                          |
| b/Å               | 19.6039(7)                                                                        | 24.9553(13)                                                                                                       | 13.2815(2)                                                                                       | 13.1212(4)                                                                                                                          |
| c/Å               | 15.6787(6)                                                                        | 13.7959(7)                                                                                                        | 18.8611(5)                                                                                       | 16.9409(4)                                                                                                                          |
| α/°               | 90                                                                                | 90                                                                                                                | 90.00                                                                                            | 83.345(2)                                                                                                                           |
| β/°               | 93.440(3)                                                                         | 108.1170(10)                                                                                                      | 90.052(3)                                                                                        | 68.758(2)                                                                                                                           |

# X-RAY TABLES

**Table S1:** Crystal data and structure refinement.

|                                             | <b>5</b>                                                                          | Na[ <b>3</b> ]                                                                                       | Na[ <b>6</b> ]                                                                                   | <b>7</b>                                                                        | <b>7</b>                                                                                        |
|---------------------------------------------|-----------------------------------------------------------------------------------|------------------------------------------------------------------------------------------------------|--------------------------------------------------------------------------------------------------|---------------------------------------------------------------------------------|-------------------------------------------------------------------------------------------------|
| CCDC                                        | CCDC 1494719                                                                      | CCDC 1494721                                                                                         | CCDC 1494716                                                                                     | CCDC 1494717                                                                    | CCDC 1494802                                                                                    |
| Empirical formula                           | C <sub>39</sub> H <sub>41</sub> MoN <sub>3</sub> O <sub>9</sub> P <sub>6</sub> Si | C <sub>36.46</sub> H <sub>44.9</sub> BN <sub>3</sub> N <sub>3</sub> aO <sub>7.4</sub> P <sub>6</sub> | C <sub>55</sub> H <sub>73</sub> BMoN <sub>3</sub> N <sub>3</sub> aO <sub>16</sub> P <sub>6</sub> | C <sub>30</sub> H <sub>25</sub> N <sub>3</sub> O <sub>3</sub> P <sub>6</sub> Ti | C <sub>24</sub> H <sub>19</sub> Cl <sub>2</sub> N <sub>3</sub> O <sub>3</sub> P <sub>6</sub> Ti |
| Formula weight                              | 1005.60                                                                           | 863.20                                                                                               | 1347.72                                                                                          | 709.25                                                                          | 702.04                                                                                          |
| Temperature/K                               | 106.48(14)                                                                        | 106(9)                                                                                               | 107(6)                                                                                           | 104.7(10)                                                                       | 104.6(2)                                                                                        |
| Crystal system                              | orthorhombic                                                                      | orthorhombic                                                                                         | monoclinic                                                                                       | orthorhombic                                                                    | monoclinic                                                                                      |
| Space group                                 | Pbca                                                                              | Pna2 <sub>1</sub>                                                                                    | P2 <sub>1</sub> /n                                                                               | P2 <sub>1</sub> 2 <sub>1</sub> 2 <sub>1</sub>                                   | P2 <sub>1</sub> /n                                                                              |
| a/Å                                         | 28.4804(10)                                                                       | 33.7644(14)                                                                                          | 12.9566(4)                                                                                       | 13.1587(2)                                                                      | 7.4263(3)                                                                                       |
| b/Å                                         | 18.1858(6)                                                                        | 12.0728(6)                                                                                           | 29.5914(8)                                                                                       | 20.1174(3)                                                                      | 15.2635(8)                                                                                      |
| c/Å                                         | 16.8840(4)                                                                        | 11.6209(5)                                                                                           | 16.6475(5)                                                                                       | 24.1036(4)                                                                      | 26.3095(15)                                                                                     |
| α/°                                         | 90                                                                                | 90                                                                                                   | 90                                                                                               | 90                                                                              | 90                                                                                              |
| β/°                                         | 90                                                                                | 90                                                                                                   | 90.824(3)                                                                                        | 90                                                                              | 92.364(4)                                                                                       |
| γ/°                                         | 90                                                                                | 90                                                                                                   | 90                                                                                               | 90                                                                              | 90                                                                                              |
| Volume/Å <sup>3</sup>                       | 8744.9(5)                                                                         | 4737.1(4)                                                                                            | 6382.1(3)                                                                                        | 6380.68(17)                                                                     | 2979.7(3)                                                                                       |
| Z                                           | 8                                                                                 | 4                                                                                                    | 4                                                                                                | 8                                                                               | 4                                                                                               |
| ρ <sub>calc</sub> /g/cm <sup>3</sup>        | 1.528                                                                             | 1.210                                                                                                | 1.403                                                                                            | 1.477                                                                           | 1.565                                                                                           |
| μ/mm <sup>-1</sup>                          | 0.603                                                                             | 0.281                                                                                                | 0.429                                                                                            | 0.606                                                                           | 0.822                                                                                           |
| F(000)                                      | 4112.0                                                                            | 1799.0                                                                                               | 2800.0                                                                                           | 2896.0                                                                          | 1416.0                                                                                          |
| Reflections collected                       | 47716                                                                             | 34644                                                                                                | 43016                                                                                            | 30300                                                                           | 26042                                                                                           |
| Independent reflections                     | 6938                                                                              | 9513                                                                                                 | 14875                                                                                            | 15821                                                                           | 12040                                                                                           |
| R <sub>int</sub>                            | 0.1278                                                                            | 0.1077                                                                                               | 0.0653                                                                                           | 0.0300                                                                          | 0.0526                                                                                          |
| R <sub>sigma</sub>                          | 0.0823                                                                            | 0.0965                                                                                               | 0.0988                                                                                           | 0.0599                                                                          | 0.0806                                                                                          |
| Data/restraints/parameters                  | 6938/0/532                                                                        | 9513/61/436                                                                                          | 14875/0/748                                                                                      | 15821/0/777                                                                     | 12040/0/352                                                                                     |
| GOF                                         | 1.335                                                                             | 1.059                                                                                                | 1.060                                                                                            | 1.048                                                                           | 1.068                                                                                           |
| R <sub>1</sub> [I>2σ (I)]                   | 0.0972                                                                            | 0.1122                                                                                               | 0.0740                                                                                           | 0.0521                                                                          | 0.0671                                                                                          |
| wR <sub>2</sub> [I>2σ (I)]                  | 0.1556                                                                            | 0.2802                                                                                               | 0.1282                                                                                           | 0.1083                                                                          | 0.1633                                                                                          |
| Largest diff. peak/hole / e Å <sup>-3</sup> | 0.92/-0.74                                                                        | 0.73/-0.65                                                                                           | 0.68/-0.50                                                                                       | 1.50/-0.40                                                                      | 1.33/-1.58                                                                                      |

|                                               |               |            |             |               |
|-----------------------------------------------|---------------|------------|-------------|---------------|
| $\gamma/^\circ$                               | 90            | 90         | 90.00       | 60.501(3)     |
| Volume/ $\text{\AA}^3$                        | 3386.17(19)   | 4223.9(4)  | 3994.33(14) | 2357.64(12)   |
| Z                                             | 4             | 2          | 2           | 1             |
| $\rho_{\text{calc}}/\text{g}/\text{cm}^3$     | 1.705         | 1.425      | 1.475       | 1.620         |
| $\mu/\text{mm}^{-1}$                          | 0.941         | 0.530      | 1.622       | 1.754         |
| F(000)                                        | 1744.0        | 1876.0     | 1808.0      | 1154.0        |
| Reflections collected                         | 25661         | 50291      | 13164       | 38086         |
| Independent reflections                       | 10325         | 8349       | 7328        | 13365         |
| $R_{\text{int}}$                              | 0.0676        | 0.0748     | 0.0365      | 0.0236        |
| $R_{\text{sigma}}$                            | 0.1100        | 0.0781     | 0.0629      | 0.0285        |
| Data/restraints/parameters                    | 10325/102/449 | 8349/0/481 | 7328/0/454  | 13365/534/564 |
| GOF                                           | 0.976         | 0.906      | 1.032       | 1.032         |
| $R_1$ [ $I > 2\sigma(I)$ ]                    | 0.0563        | 0.0374     | 0.0415      | 0.0230        |
| $wR_2$ [ $I > 2\sigma(I)$ ]                   | 0.0825        | 0.0642     | 0.0723      | 0.0529        |
| Largest diff. peak/hole / $e \text{\AA}^{-3}$ | 1.47/-0.76    | 0.54/-0.37 | 0.61/-0.51  | 0.66/-0.55    |

|                                                | 4                                                                            | 11                                                             | 12                                                                                                        |
|------------------------------------------------|------------------------------------------------------------------------------|----------------------------------------------------------------|-----------------------------------------------------------------------------------------------------------|
| CCDC                                           | CCDC 1495123                                                                 | CCDC 1495143                                                   | CCDC 1495146                                                                                              |
| Empirical formula                              | C <sub>50</sub> H <sub>50</sub> N <sub>2</sub> O <sub>4</sub> P <sub>7</sub> | C <sub>18</sub> H <sub>32</sub> N <sub>3</sub> OP <sub>3</sub> | C <sub>22.5</sub> H <sub>34.4</sub> Cl <sub>2.71</sub> Mo<br>N <sub>3</sub> O <sub>4</sub> P <sub>3</sub> |
| Formula weight                                 | 959.71                                                                       | 399.37                                                         | 695.90                                                                                                    |
| Temperature/K                                  | 105(1)                                                                       | 104.79(12)                                                     | 106.05(13)                                                                                                |
| Crystal system                                 | triclinic                                                                    | orthorhombic                                                   | orthorhombic                                                                                              |
| Space group                                    | P-1                                                                          | Pbca                                                           | Fdd2                                                                                                      |
| a/Å                                            | 8.6804(3)                                                                    | 12.9301(4)                                                     | 59.1004(11)                                                                                               |
| b/Å                                            | 11.7969(5)                                                                   | 11.3677(4)                                                     | 34.6994(6)                                                                                                |
| c/Å                                            | 12.7633(5)                                                                   | 29.4791(17)                                                    | 12.38327(19)                                                                                              |
| α/°                                            | 112.956(4)                                                                   | 90                                                             | 90                                                                                                        |
| β/°                                            | 104.532(3)                                                                   | 90                                                             | 90                                                                                                        |
| γ/°                                            | 93.858(3)                                                                    | 90                                                             | 90                                                                                                        |
| Volume/Å <sup>3</sup>                          | 1144.80(9)                                                                   | 4333.0(3)                                                      | 25394.9(8)                                                                                                |
| Z                                              | 1                                                                            | 8                                                              | 32                                                                                                        |
| ρ <sub>calc</sub> /cm <sup>3</sup>             | 1.392                                                                        | 1.224                                                          | 1.456                                                                                                     |
| μ/mm <sup>-1</sup>                             | 0.318                                                                        | 0.286                                                          | 0.824                                                                                                     |
| F(000)                                         | 501.0                                                                        | 1712.0                                                         | 11376.0                                                                                                   |
| Reflections<br>collected                       | 12458                                                                        | 14270                                                          | 32415                                                                                                     |
| Independent<br>reflections                     | 4678                                                                         | 5923                                                           | 12027                                                                                                     |
| R <sub>int</sub>                               | 0.0325                                                                       | 0.0210                                                         | 0.0374                                                                                                    |
| R <sub>sigma</sub>                             | 0.0458                                                                       | 0.0312                                                         | 0.0436                                                                                                    |
| Data/restraints/para<br>meters                 | 4678/0/329                                                                   | 5923/0/234                                                     | 12027/1/671                                                                                               |
| GOF                                            | 1.180                                                                        | 1.113                                                          | 1.093                                                                                                     |
| R <sub>1</sub> [I>2σ (I)]                      | 0.0589                                                                       | 0.0396                                                         | 0.0487                                                                                                    |
| R <sub>1</sub> [I>2σ (I)]                      | 0.1087                                                                       | 0.0844                                                         | 0.1120                                                                                                    |
| Largest diff.<br>peak/hole / e Å <sup>-3</sup> | 0.47/-0.65                                                                   | 0.44/-0.30                                                     | 0.91/-0.80                                                                                                |

# CALCULATION DETAILS HOMO LUMO REPRESENTATIONS

[Ti(1)<sub>6</sub>]<sup>2-</sup>

-2 1

|    |             |             |             |
|----|-------------|-------------|-------------|
| C  | -3.17872705 | -3.27975595 | -3.07012544 |
| N  | -1.98736405 | -2.81607730 | -2.48659605 |
| C  | -0.77150802 | -3.43472743 | -2.74498833 |
| C  | -0.69697342 | -4.49855392 | -3.58935297 |
| C  | -1.87583348 | -4.99654223 | -4.21681066 |
| C  | -3.07659677 | -4.39027869 | -3.94797299 |
| C  | -2.06626796 | -1.71285505 | -1.62458961 |
| O  | -0.94397979 | -1.29683356 | -1.12640616 |
| Ti | -0.00002069 | -0.00006187 | -0.00001213 |
| O  | -0.65606525 | 1.46490913  | -1.12480306 |
| C  | -0.45700619 | 2.64375346  | -1.62614937 |
| N  | -1.45499065 | 3.12486424  | -2.48576115 |
| C  | -1.26318188 | 4.38715683  | -3.07279223 |
| C  | -2.27895798 | 4.85157182  | -3.94848793 |
| C  | -3.40518675 | 4.11396913  | -4.21158306 |
| C  | -3.56111486 | 2.84566503  | -3.58029031 |
| C  | -2.59951402 | 2.38042926  | -2.73819384 |
| P  | 0.20639447  | 5.25860549  | -2.66625870 |
| P  | 0.92311372  | 3.71131775  | -1.35504465 |
| P  | -4.66653192 | -2.44322627 | -2.65661500 |
| P  | -3.67969147 | -1.05121481 | -1.34686219 |
| O  | 0.94389758  | 1.29675647  | 1.12633147  |
| C  | 2.06614963  | 1.71284268  | 1.62452715  |
| N  | 1.98714737  | 2.81609354  | 2.48647925  |
| C  | 0.77126748  | 3.43478903  | 2.74464659  |
| C  | 0.69662812  | 4.49862172  | 3.58899262  |
| C  | 1.87539706  | 4.99656267  | 4.21666010  |
| C  | 3.07618675  | 4.39025740  | 3.94803232  |
| C  | 3.17842798  | 3.27972986  | 3.07020315  |
| P  | 4.66628480  | 2.44320481  | 2.65686578  |
| P  | 3.67956580  | 1.05102436  | 1.34719948  |
| O  | 1.59200811  | -0.16551849 | -1.13094238 |
| C  | 2.51250472  | -0.92830695 | -1.63269650 |
| N  | 3.42756171  | -0.30629477 | -2.49401534 |
| C  | 3.35582302  | 1.05681274  | -2.74802378 |
| C  | 4.23874356  | 1.65525962  | -3.59212065 |
| C  | 5.25790197  | 0.88462865  | -4.22367034 |
| C  | 5.33295820  | -0.45925166 | -3.95900361 |
| C  | 4.42333039  | -1.10504281 | -3.08156913 |
| P  | 4.44252209  | -2.81299313 | -2.67311452 |
| P  | 2.74590907  | -2.65724542 | -1.36003055 |
| O  | 0.65601854  | -1.46505239 | 1.12476809  |
| C  | 0.45690761  | -2.64387825 | 1.62614279  |
| N  | 1.45501719  | -3.12510372 | 2.48553114  |
| C  | 1.26324563  | -4.38742713 | 3.07250691  |
| C  | 2.27916451  | -4.85195909 | 3.94797493  |
| C  | 3.40549200  | -4.11444241 | 4.21089490  |
| C  | 3.56138843  | -2.84611930 | 3.57962945  |
| C  | 2.59965073  | -2.38076924 | 2.73775305  |
| P  | -0.20640264 | -5.25881290 | 2.66609628  |
| P  | -0.92333727 | -3.71133524 | 1.35522188  |
| O  | -1.59202083 | 0.16546260  | 1.13096168  |
| C  | -2.51241214 | 0.92836074  | 1.63274122  |
| N  | -3.42750290 | 0.30651560  | 2.49414707  |
| C  | -3.35599207 | -1.05660474 | 2.74815331  |
| C  | -4.23894222 | -1.65488830 | 3.59233647  |
| C  | -5.25789220 | -0.88406753 | 4.22398959  |
| C  | -5.33271303 | 0.45982986  | 3.95934635  |
| C  | -4.42305204 | 1.10545326  | 3.08182140  |
| P  | -4.44194710 | 2.81341667  | 2.67341436  |
| P  | -2.74538500 | 2.65739313  | 1.36029779  |

|   |             |             |             |
|---|-------------|-------------|-------------|
| H | 2.56709881  | 1.57970046  | -2.22604180 |
| H | -0.27290103 | 4.95353972  | 3.76228938  |
| H | 4.44071625  | -2.23354181 | 3.74842795  |
| H | 2.12713378  | -5.82662358 | 4.40369743  |
| H | 5.96582222  | 1.35873895  | -4.89826773 |
| H | 3.99803923  | 4.74509744  | 4.40085228  |
| H | -0.07748492 | 3.01286205  | 2.22544396  |
| H | 6.10006968  | -1.07934530 | -4.41484793 |
| H | 1.82057307  | 5.84661161  | 4.89151836  |
| H | 2.65648217  | -1.43594477 | 2.21612338  |
| H | 4.14824518  | 2.72287847  | -3.76231797 |
| H | 4.17145053  | -4.49027930 | 4.88400104  |
| H | -2.56741476 | -1.57963643 | 2.22609381  |
| H | 0.27254573  | -4.95342320 | -3.76283697 |
| H | -4.44036178 | 2.23301432  | -3.74924183 |
| H | -2.12688693 | 5.82620627  | -4.40426225 |
| H | -5.96583773 | -1.35804770 | 4.89865230  |
| H | -3.99851042 | -4.74513059 | -4.40065903 |
| H | 0.07732261  | -3.01275235 | -2.22595818 |
| H | -6.09965702 | 1.08006688  | 4.41527717  |
| H | -1.82109223 | -5.84657107 | -4.89170101 |
| H | -2.65637579 | 1.43562676  | -2.21653432 |
| H | -4.14863061 | -2.72252487 | 3.76252079  |
| H | -4.17103091 | 4.48971120  | -4.88487213 |

Excitation energies and oscillator strengths:

|               |    |           |           |           |          |
|---------------|----|-----------|-----------|-----------|----------|
| Excited State | 1: | Singlet-A | 2.0369 eV | 608.70 nm | f=0.0003 |
| <S**2>=0.000  |    |           |           |           |          |
| 266 -> 269    |    | 0.37478   |           |           |          |
| 266 -> 270    |    | -0.28409  |           |           |          |
| 267 -> 269    |    | 0.39501   |           |           |          |
| 267 -> 270    |    | 0.32958   |           |           |          |

|               |    |           |           |           |          |
|---------------|----|-----------|-----------|-----------|----------|
| Excited State | 2: | Singlet-A | 2.0385 eV | 608.21 nm | f=0.0052 |
| <S**2>=0.000  |    |           |           |           |          |
| 266 -> 268    |    | 0.35938   |           |           |          |
| 266 -> 269    |    | -0.29106  |           |           |          |
| 266 -> 270    |    | 0.30477   |           |           |          |
| 267 -> 268    |    | 0.23344   |           |           |          |
| 267 -> 269    |    | 0.26457   |           |           |          |
| 267 -> 270    |    | 0.24482   |           |           |          |

|               |    |           |           |           |          |
|---------------|----|-----------|-----------|-----------|----------|
| Excited State | 3: | Singlet-A | 2.0387 eV | 608.15 nm | f=0.0052 |
| <S**2>=0.000  |    |           |           |           |          |
| 266 -> 268    |    | -0.23391  |           |           |          |
| 266 -> 269    |    | 0.23492   |           |           |          |
| 266 -> 270    |    | 0.31001   |           |           |          |
| 267 -> 268    |    | 0.35483   |           |           |          |
| 267 -> 269    |    | 0.21632   |           |           |          |
| 267 -> 270    |    | -0.33539  |           |           |          |

|               |    |           |           |           |          |
|---------------|----|-----------|-----------|-----------|----------|
| Excited State | 4: | Singlet-A | 2.0929 eV | 592.39 nm | f=0.0155 |
| <S**2>=0.000  |    |           |           |           |          |
| 263 -> 268    |    | -0.27257  |           |           |          |
| 266 -> 269    |    | 0.32898   |           |           |          |
| 266 -> 270    |    | 0.31999   |           |           |          |
| 267 -> 269    |    | -0.31805  |           |           |          |
| 267 -> 270    |    | 0.32846   |           |           |          |

|               |    |           |           |           |          |
|---------------|----|-----------|-----------|-----------|----------|
| Excited State | 5: | Singlet-A | 2.1001 eV | 590.37 nm | f=0.0000 |
| <S**2>=0.000  |    |           |           |           |          |
| 264 -> 269    |    | 0.47221   |           |           |          |
| 264 -> 270    |    | -0.14875  |           |           |          |
| 265 -> 269    |    | -0.14988  |           |           |          |
| 265 -> 270    |    | -0.46978  |           |           |          |

|               |    |           |           |           |          |
|---------------|----|-----------|-----------|-----------|----------|
| Excited State | 6: | Singlet-A | 2.1104 eV | 587.50 nm | f=0.0826 |
| <S**2>=0.000  |    |           |           |           |          |

|                   |           |           |           |          |
|-------------------|-----------|-----------|-----------|----------|
| 263 -> 269        | 0.28719   |           |           |          |
| 266 -> 268        | -0.23750  |           |           |          |
| 266 -> 269        | -0.17030  |           |           |          |
| 266 -> 270        | -0.21764  |           |           |          |
| 267 -> 268        | 0.44184   |           |           |          |
| 267 -> 269        | -0.21653  |           |           |          |
| 267 -> 270        | 0.17013   |           |           |          |
|                   |           |           |           |          |
| Excited State 7:  | Singlet-A | 2.1106 eV | 587.45 nm | f=0.0826 |
| <S**2>=0.000      |           |           |           |          |
| 263 -> 270        | -0.28690  |           |           |          |
| 266 -> 268        | 0.44217   |           |           |          |
| 266 -> 269        | 0.21710   |           |           |          |
| 266 -> 270        | -0.17248  |           |           |          |
| 267 -> 268        | 0.23711   |           |           |          |
| 267 -> 269        | -0.16878  |           |           |          |
| 267 -> 270        | -0.21673  |           |           |          |
|                   |           |           |           |          |
| Excited State 8:  | Singlet-A | 2.1133 eV | 586.70 nm | f=0.0000 |
| <S**2>=0.000      |           |           |           |          |
| 264 -> 269        | -0.23896  |           |           |          |
| 264 -> 270        | -0.11747  |           |           |          |
| 265 -> 268        | 0.57964   |           |           |          |
| 265 -> 269        | 0.11804   |           |           |          |
| 265 -> 270        | -0.24529  |           |           |          |
|                   |           |           |           |          |
| Excited State 9:  | Singlet-A | 2.1135 eV | 586.64 nm | f=0.0000 |
| <S**2>=0.000      |           |           |           |          |
| 264 -> 268        | 0.57862   |           |           |          |
| 264 -> 269        | -0.11622  |           |           |          |
| 264 -> 270        | 0.24145   |           |           |          |
| 265 -> 269        | -0.24520  |           |           |          |
| 265 -> 270        | -0.11973  |           |           |          |
|                   |           |           |           |          |
| Excited State 10: | Singlet-A | 2.1826 eV | 568.07 nm | f=0.0000 |
| <S**2>=0.000      |           |           |           |          |
| 262 -> 269        | 0.24324   |           |           |          |
| 264 -> 268        | 0.14503   |           |           |          |
| 264 -> 269        | 0.39991   |           |           |          |
| 265 -> 268        | 0.29644   |           |           |          |
| 265 -> 270        | 0.39736   |           |           |          |
|                   |           |           |           |          |
| Excited State 11: | Singlet-A | 2.1828 eV | 568.00 nm | f=0.0000 |
| <S**2>=0.000      |           |           |           |          |
| 262 -> 270        | 0.24330   |           |           |          |
| 264 -> 268        | 0.29830   |           |           |          |
| 264 -> 270        | -0.39454  |           |           |          |
| 265 -> 268        | -0.14492  |           |           |          |
| 265 -> 269        | 0.40149   |           |           |          |
|                   |           |           |           |          |
| Excited State 12: | Singlet-A | 2.2083 eV | 561.46 nm | f=0.0000 |
| <S**2>=0.000      |           |           |           |          |
| 262 -> 268        | 0.38753   |           |           |          |
| 264 -> 269        | 0.13847   |           |           |          |
| 264 -> 270        | 0.39183   |           |           |          |
| 265 -> 269        | 0.38211   |           |           |          |
| 265 -> 270        | -0.14045  |           |           |          |
|                   |           |           |           |          |
| Excited State 13: | Singlet-A | 2.2663 eV | 547.07 nm | f=0.1377 |
| <S**2>=0.000      |           |           |           |          |
| 263 -> 269        | 0.61856   |           |           |          |
| 263 -> 270        | -0.13232  |           |           |          |
| 266 -> 269        | 0.10249   |           |           |          |
| 267 -> 268        | -0.21596  |           |           |          |
| 267 -> 270        | -0.10799  |           |           |          |
|                   |           |           |           |          |
| Excited State 14: | Singlet-A | 2.2669 eV | 546.92 nm | f=0.1381 |
| <S**2>=0.000      |           |           |           |          |
| 263 -> 269        | 0.13264   |           |           |          |

|            |          |  |
|------------|----------|--|
| 263 -> 270 | 0.61883  |  |
| 266 -> 268 | 0.21590  |  |
| 266 -> 270 | -0.10351 |  |
| 267 -> 269 | -0.10673 |  |

  

|                   |           |           |           |          |
|-------------------|-----------|-----------|-----------|----------|
| Excited State 15: | Singlet-A | 2.2781 eV | 544.25 nm | f=0.2288 |
| <S**2>=0.000      |           |           |           |          |
| 263 -> 268        | 0.64582   |           |           |          |
| 266 -> 269        | 0.11115   |           |           |          |
| 266 -> 270        | 0.16711   |           |           |          |
| 267 -> 269        | -0.16051  |           |           |          |
| 267 -> 270        | 0.10772   |           |           |          |

# [CpTi(1)<sub>3</sub>]

0 1

|    |             |             |            |
|----|-------------|-------------|------------|
| Ti | 4.39180000  | 9.17680000  | 3.35350000 |
| P  | 5.30970000  | 13.37790000 | 7.27900000 |
| P  | 8.79650000  | 5.67710000  | 1.78100000 |
| P  | 8.26670000  | 7.48810000  | 2.74200000 |
| P  | -1.05640000 | 7.78990000  | 2.23510000 |
| P  | 0.93870000  | 7.09720000  | 2.05840000 |
| P  | 3.85560000  | 12.28890000 | 6.19050000 |
| O  | 4.66340000  | 9.97960000  | 4.98820000 |
| N  | 6.27930000  | 11.14400000 | 6.13340000 |
| C  | 1.03160000  | 9.84140000  | 4.97880000 |
| H  | 1.91990000  | 9.86560000  | 5.25700000 |
| O  | 5.63850000  | 7.83230000  | 3.39160000 |
| C  | 7.91760000  | 12.35210000 | 7.39020000 |
| H  | 8.15440000  | 13.07230000 | 7.92770000 |
| N  | 6.16350000  | 5.87210000  | 2.31760000 |
| C  | -0.67770000 | 8.91400000  | 3.51190000 |
| C  | 7.16360000  | 5.06150000  | 1.76250000 |
| C  | 1.53300000  | 8.15160000  | 3.28770000 |
| C  | 4.46610000  | 4.29710000  | 1.78130000 |
| H  | 3.56860000  | 4.05370000  | 1.76200000 |
| N  | 0.64740000  | 8.98380000  | 3.93880000 |
| C  | 4.82920000  | 5.49000000  | 2.31640000 |
| H  | 4.18320000  | 6.05130000  | 2.68270000 |
| C  | 6.59250000  | 7.08130000  | 2.82980000 |
| C  | 7.24910000  | 10.19750000 | 5.80660000 |
| H  | 7.02670000  | 9.47130000  | 5.27150000 |
| C  | 5.46350000  | 10.79300000 | 2.08500000 |
| H  | 6.29250000  | 11.11490000 | 2.35730000 |
| C  | -1.61190000 | 9.75490000  | 4.16750000 |
| H  | -2.50540000 | 9.72880000  | 3.90960000 |
| C  | 6.58720000  | 12.25550000 | 6.91870000 |
| C  | 6.75440000  | 3.80820000  | 1.24860000 |
| H  | 7.39390000  | 3.22880000  | 0.90150000 |
| C  | 0.12240000  | 10.63000000 | 5.57520000 |
| H  | 0.38420000  | 11.20140000 | 6.25970000 |
| C  | 5.22800000  | 9.69060000  | 1.24370000 |
| H  | 5.87540000  | 9.15340000  | 0.84840000 |
| C  | 5.44240000  | 3.42600000  | 1.25340000 |
| H  | 5.19370000  | 2.59920000  | 0.91110000 |
| C  | 3.86600000  | 9.55580000  | 1.11360000 |
| H  | 3.43180000  | 8.90190000  | 0.61460000 |
| C  | 4.97400000  | 11.05450000 | 5.71210000 |
| C  | -1.23820000 | 10.59580000 | 5.16300000 |
| H  | -1.86590000 | 11.14710000 | 5.57030000 |
| C  | 8.50320000  | 10.33230000 | 6.26450000 |
| H  | 9.14530000  | 9.69860000  | 6.04040000 |
| C  | 8.85580000  | 11.42670000 | 7.08160000 |
| H  | 9.72430000  | 11.51120000 | 7.40460000 |
| C  | 4.21870000  | 11.31400000 | 2.43690000 |
| H  | 4.07520000  | 12.05230000 | 2.98160000 |
| C  | 3.24760000  | 10.55760000 | 1.84630000 |
| H  | 2.33040000  | 10.69240000 | 1.92110000 |
| O  | 2.81730000  | 8.26540000  | 3.64660000 |

Excited State 1: Singlet-A 2.4515 eV 505.75 nm f=0.0087 <S\*\*2>=0.000  
155 ->158 -0.37319  
155 ->159 0.20247  
156 ->157 -0.24423  
156 ->158 0.46892

Excited State 2: Singlet-A 2.4581 eV 504.40 nm f=0.0146  
<S\*\*2>=0.000  
155 ->157 0.57822  
155 ->158 0.11448  
155 ->159 -0.19432  
156 ->158 0.29899

|               |           |           |           |           |          |
|---------------|-----------|-----------|-----------|-----------|----------|
| Excited State | 3:        | Singlet-A | 2.4817 eV | 499.60 nm | f=0.0543 |
| <S**2>=0.000  |           |           |           |           |          |
|               | 154 ->158 | -0.13189  |           |           |          |
|               | 155 ->159 | 0.21272   |           |           |          |
|               | 156 ->157 | 0.56866   |           |           |          |
|               | 156 ->158 | 0.16968   |           |           |          |
|               | 156 ->159 | 0.22782   |           |           |          |
|               |           |           |           |           |          |
| Excited State | 4:        | Singlet-A | 2.5305 eV | 489.97 nm | f=0.0434 |
| <S**2>=0.000  |           |           |           |           |          |
|               | 154 ->158 | 0.30640   |           |           |          |
|               | 155 ->157 | -0.18019  |           |           |          |
|               | 155 ->158 | 0.36221   |           |           |          |
|               | 156 ->157 | -0.15463  |           |           |          |
|               | 156 ->159 | 0.44590   |           |           |          |
|               |           |           |           |           |          |
| Excited State | 5:        | Singlet-A | 2.5476 eV | 486.66 nm | f=0.0609 |
| <S**2>=0.000  |           |           |           |           |          |
|               | 154 ->157 | 0.12482   |           |           |          |
|               | 154 ->158 | -0.17512  |           |           |          |
|               | 154 ->159 | -0.21085  |           |           |          |
|               | 155 ->157 | 0.24611   |           |           |          |
|               | 155 ->159 | 0.43657   |           |           |          |
|               | 156 ->157 | -0.13653  |           |           |          |
|               | 156 ->158 | -0.25091  |           |           |          |
|               | 156 ->159 | 0.23646   |           |           |          |
|               |           |           |           |           |          |
| Excited State | 6:        | Singlet-A | 2.6093 eV | 475.17 nm | f=0.0293 |
| <S**2>=0.000  |           |           |           |           |          |
|               | 154 ->157 | 0.41988   |           |           |          |
|               | 155 ->158 | -0.34074  |           |           |          |
|               | 155 ->159 | -0.29028  |           |           |          |
|               | 156 ->157 | 0.11304   |           |           |          |
|               | 156 ->158 | -0.10100  |           |           |          |
|               | 156 ->159 | 0.28622   |           |           |          |
|               |           |           |           |           |          |
| Excited State | 7:        | Singlet-A | 2.6720 eV | 464.02 nm | f=0.1742 |
| <S**2>=0.000  |           |           |           |           |          |
|               | 154 ->158 | 0.57395   |           |           |          |
|               | 155 ->157 | 0.13331   |           |           |          |
|               | 155 ->158 | -0.13796  |           |           |          |
|               | 155 ->159 | 0.17734   |           |           |          |
|               | 156 ->157 | 0.20198   |           |           |          |
|               | 156 ->158 | -0.12002  |           |           |          |
|               | 156 ->159 | -0.16667  |           |           |          |
|               |           |           |           |           |          |
| Excited State | 8:        | Singlet-A | 2.7105 eV | 457.42 nm | f=0.1220 |
| <S**2>=0.000  |           |           |           |           |          |
|               | 154 ->159 | 0.63496   |           |           |          |
|               | 155 ->157 | 0.16193   |           |           |          |
|               | 155 ->159 | 0.10364   |           |           |          |
|               | 156 ->158 | -0.14717  |           |           |          |

## NOTES AND REFERENCES

1. R. Suter, Z. Benkő, M. Bispinghoff and H. Grützmacher, *Angew Chem Int Ed Engl*, 2017, **56**, 11226-11231.
2. C. J. Breheny, J. M. Kelly, C. Long, S. O'Keeffe, M. T. Pryce, G. Russell and M. M. Walsh, *Organometallics*, 1998, **17**, 3690-3695.
